1 Title: Serum metabolomic biomarkers of perceptual speed in cognitively normal and mildly  
2 impaired subjects with fasting state stratification

3

4 Authors:

5 Kamil Borkowski<sup>1\*</sup>, Ameer Y. Taha<sup>1,2</sup>, Theresa L. Pedersen<sup>2</sup>, Philip L. De Jager<sup>3</sup>, David A.  
6 Bennett<sup>4</sup>, Rima Kaddurah-Daouk<sup>5</sup>, John W. Newman<sup>1,6,7</sup>

7

8 Author Affiliations:

9 1 – West Coast Metabolomics Center, Genome Center, University of California Davis, Davis,  
10 CA 95616, USA.

11 2 – Dept Food Science and Technology, University of California - Davis, Davis, CA 95616,  
12 USA.

13 3 – Center for Translational & Computational Neuroimmunology, Department of Neurology &  
14 Taub Institute for Research on Alzheimer's disease and the Aging Brain, Columbia  
15 University Irving Medical Center, New York, NY 10032, USA.

16 4 – Rush Alzheimer's Disease Center, Rush Medical College, Rush University, Chicago, IL  
17 60612, USA.

18 5 – Department of Psychiatry and Behavioral Sciences, Duke Institute for Brain Sciences and  
19 Department of Medicine, Duke University, Durham NC 27708, USA.

20 6 – Western Human Nutrition Research Center, United States Department of Agriculture -  
21 Agriculture Research Service, Davis, CA 95616, USA.

22 7 – Department of Nutrition, University of California - Davis, Davis, CA 95616, USA.

23

24 \* Corresponding author

25

26

27

28

29

30

31

32

33

34

35 **Abstract**

36

37 Cognitive decline is associated with both normal aging and early pathologies leading to  
38 dementia. Here we used quantitative profiling of metabolites involved in the regulation of  
39 inflammation, vascular function, neuronal function and energy metabolism, including oxylipins,  
40 endocannabinoids, bile acids, and steroid hormones to identify metabolic biomarkers of mild  
41 cognitive impairment (MCI). Serum samples (n =210) were obtained from subjects with or  
42 without MCI opportunistically collected with incomplete fasting state information. To maximize  
43 power and stratify the analysis of metabolite associations with MCI by the fasting state, we  
44 developed an algorithm to predict subject fasting state when unknown (n =71). In non-fasted  
45 subjects, linoleic acid and palmitoleoyl ethanolamide levels were positively associated with  
46 perceptual speed. In fasted subjects, soluble epoxide hydrolase activity and tauro-alpha-  
47 muricholic acid levels were negatively associated with perceptual speed. Other cognitive  
48 domains showed associations with bile acid metabolism, but only in the non-fasted state.  
49 Importantly, this study shows unique associations between serum metabolites and cognitive  
50 function in the fasted and non-fasted states and provides a fasting state prediction algorithm  
51 based on measurable metabolites.

52

53 Key Words: Cognition, inflammation, lipid mediators, fasting state prediction, soluble epoxide  
54 hydrolase, metabolomics, lipidomics

55

56

## 57 **1. Introduction**

58 Neurocognitive disorders including Alzheimer's dementia (AD) are associated with  
59 cognitive decline. Biochemical markers of altered cognitive capacity may provide diagnostic  
60 and prognostic biomarkers of these diseases and their associated metabolic trajectories before  
61 clinical symptoms manifest. Additionally, such biomarkers could provide new insights into the  
62 mechanisms of cognitive decline. Cognition can be decomposed into dissociable domains,  
63 characterized as perceptual speed, perceptual orientation along with semantic, working and  
64 episodic memory. These cognitive domains become increasingly inter-correlated as people  
65 become cognitively impaired <sup>1</sup>, and have been linked to pathologic changes in the brain <sup>2</sup>. While  
66 the events which initiate these changes are as yet unknown, dysregulated cellular mechanisms  
67 associated with metabolic dysfunctions and/or inflammatory responses are attractive hypotheses.

68 It has recently become clear that cardiometabolic disorders and associated low-grade  
69 systemic inflammation and altered lipid and energy metabolism, are risk factors for AD <sup>3-5</sup>.  
70 Therefore, changes in circulating markers of low-grade inflammation and metabolism may track  
71 these pertinent metabolic changes. Obesity and the metabolic syndrome shift the profile of both  
72 plasma lipids and multiple lipid-derived physiological mediators <sup>6,7</sup>. Four important families of  
73 such lipid mediators readily detected in the circulation are the oxygenated polyunsaturated fatty  
74 acids (i.e. oxylipins), the endogenous cannabinoid receptor activators and their structural  
75 equivalents (i.e. endocannabinoids), bile acids and steroids.

76 The oxylipins including fatty acid alcohols, diols, epoxides, ketones, and prostanoids are  
77 derived from multiple polyunsaturated fatty acids (PUFA) by the action of cyclooxygenases  
78 (COX), lipoxygenases (LOX), cytochrome P450 (CYP), soluble epoxide hydrolase (sEH) or  
79 reactive oxygen species (ROS) and various downstream enzymatic processes <sup>8,9</sup>. Circulating

80 endocannabinoids are produced either by acylation and release of acyl ethanolamides from  
81 phosphatidylethanolamine, or as a product of glycerol-lipid metabolism (monoacylglycerols).

82 Oxylipins and endocannabinoids are known to regulate multiple processes including both  
83 acute and low-grade systemic inflammation<sup>9,10</sup>, cardiovascular health<sup>11</sup>, neuronal outgrowth,  
84 cell differentiation and energetics<sup>12</sup>. Bile acids and steroid are also linked to the regulation of  
85 glucose and insulin metabolism<sup>13</sup>, energy metabolism and inflammation<sup>14,15</sup> and implicated in  
86 the pathogenesis of type 2 diabetes and metabolic syndrome<sup>16</sup>. Previous studies reported  
87 associations between AD, cognition and plasma levels of oxylipins<sup>17</sup>, bile acids<sup>18,19</sup> and steroids  
88<sup>20,21</sup>. However, broader simultaneous assessments of lipid mediator profiles in the context of mild  
89 cognitive impairment have not been conducted to date.

90 Frozen collections of serum and plasma from studies of neurocognitive disorders,  
91 including measures of cognitive function, provide a resource for biomarker discovery in this  
92 arena<sup>22</sup>. However, opportunistically collected samples rarely contain information regarding  
93 fed/fasted states, which can compromise “omics” analyses. Here, we took advantage of data and  
94 biospecimens from subjects in the Religious Order Study and Rush Memory and Aging Project  
95 (ROS/MAP)<sup>23</sup>, develop a predictive tool for the fasted/non-fasted state discrimination and  
96 stratify our biomarker discovery effort by the fasted state. We describe an exploration of  
97 circulating oxylipin, endocannabinoids, bile acids, and steroids for biomarkers of cognitive  
98 impairment, providing insights into unique associations in basal and postprandial metabolism.

99

## 100 **2. Materials and methods**

### 101 **2.1. Subjects**

102 Participants in the Religious Orders Study (ROS) are older nuns, priests, and brothers from  
103 across the United States, while those in the Rush Memory and Aging Project (MAP) are older  
104 lay persons from the greater Chicago area<sup>23</sup>. Both studies enrolled persons without known  
105 dementia and perform annual detailed clinical evaluations. Both studies were approved by an  
106 Institutional Review Board of Rush University Medical Center. All participants signed an  
107 informed consent and a repository consent to allow their biospecimens and data to be shared.  
108 ROS/MAP resources can be requested at [www.radc.rush.edu](http://www.radc.rush.edu). The current sample consists of 196  
109 subjects with 14 subjects having two blood samples collected on average  $5.8 \pm 3.3$  years apart.  
110 Repeated blood draws were in opposite fasting states (either fasted or non-fasted). Subjects  
111 demographics: 22% male, 95% white and non-Hispanic. Average age (mean  $\pm$  standard  
112 deviation) =  $78.2 \pm 7.2$ , average BMI =  $27.2 \pm 4.8$  average years of education =  $15.3 \pm 2.8$ .  
113 Number of known fasted samples as recorded by a technician = 59; non fasted = 80, unknown =  
114 71.

115

## 116 **2.2. Clinical evaluation of cognition**

117 All subjects are under a yearly structured clinical evaluation, including a medical history,  
118 neurologic examination and cognitive testing. The studies have 19 tests in common. Eleven tests  
119 are used to inform diagnostic classification of dementia and its causes, and cognitive impairment  
120 with as previously reported<sup>24,25</sup>. Mild cognitive impairment (MCI) refers to people with  
121 cognitive impairment without dementia<sup>24</sup>. No cognitive impairment (NCI) are those without  
122 dementia or MCI<sup>24</sup>. Seventeen tests are used for four measure of global cognition and five  
123 distinct cognitive domains including perceptual speed, perceptual orientation, episodic memory,  
124 semantic memory and working memory. The global cognition was calculated by converting

125 each test to a z score based on the baseline mean and standard deviation and averaging the 17  
126 tests; the domains were created by averaging subsets of z-scores as previously reported in detail  
127 <sup>26</sup>.

#### 128 **2.4. Quantification of clinical lipids, glucose and glycosylated hemoglobin**

129 Phlebotomists and nurses collected the blood specimen as previously reported <sup>27</sup>. Tests were  
130 performed by Quest Diagnostics (Secaucus, NJ). For this study we used glucose (mg/dL),  
131 hemoglobin A1c, expressed as a percentage of hemoglobin, and a basic lipid panel consisting of  
132 total cholesterol, HDL and LDL cholesterol, and triglycerides (all units mg/dL).

133

#### 134 **2.5. Quantification of oxylipins, endocannabinoids, PUFA, non-steroidal anti-inflammatory**

135 **drugs, bile acids and steroids:** Serum concentrations of non-esterified PUFA, oxylipins,  
136 endocannabinoids, a group of non-steroidal anti-inflammatory drugs (NSAIDs) including  
137 ibuprofen, naproxen, acetaminophen, a suite of conjugated and unconjugated bile acids, and a  
138 series of glucocorticoids, progestins and testosterone were quantified by liquid chromatography  
139 tandem mass spectrometry (LC-MS/MS) after protein precipitation in the presence of deuterated  
140 metabolite analogs (i.e. analytical surrogates) using modifications of published procedures <sup>28,29</sup>.  
141 Samples were processed with rigorous quality control measures including the analysis of batch  
142 blanks and replicates of serum pools and NIST Standard Reference Material 1950 (Sigma-  
143 Aldrich). Samples were re-randomized for acquisition, with method blanks and internal reference  
144 material and calibration sets scattered regularly throughout the set. Instrument limits of detection  
145 (LODs) and limits of quantification (LOQs) were estimated according to the Environmental  
146 Protection Agency method (40 CFR, Appendix B to Part 136 revision 1.11, U.S. and EPA 821-

147 R-16-006 Revision 2). These values were then transformed into sample nM concentrations by  
148 multiplying the calculated concentration by the final sample volume (i.e. 250  $\mu$ L) and dividing  
149 by the volume of sample extracted (i.e. 50  $\mu$ L). Using the Students t-Distribution, the t-value was  
150 determined at a 95% 1-tail confidence level to define the LOD. A complete analyte list with their  
151 LOD and LOQ is provided in the **Supplemental Table S1**. The majority of analytes were  
152 quantified against analytical standards with the exception of eicosapentaenoyl ethanolamide  
153 (EPEA), palmitoleoyl ethanolamide (POEA), and the measured PUFA [i.e. linoleic acid (LA);  
154 alpha-linolenic acid (aLA); arachidonic acid (AA); eicosapentaenoic acid (EPA);  
155 docosahexaenoic acid (DHA)]. For those compounds the area counts were recorded, adjusted for  
156 deuterated-surrogate and the relative response factors were expressed as the relative abundance  
157 across all analyzed samples. MAGs are reported as the sum of 1 and 2 isomers, due to their  
158 potential isomerization during the sample processing. The complete metabolomic data are  
159 available via the AD Knowledge Portal (<https://adknowledgeportal.synapse.org>). The AD  
160 Knowledge Portal is a platform for accessing data, analyses, and tools generated by the  
161 Accelerating Medicines Partnership (AMP-AD) Target Discovery Program and other National  
162 Institute on Aging (NIA)-supported programs to enable open-science practices and accelerate  
163 translational learning. The data, analyses and tools are shared early in the research cycle without  
164 a publication embargo on secondary use. Data is available for general research use according to  
165 the following requirements for data access and data attribution  
166 (<https://adknowledgeportal.synapse.org/DataAccess/Instructions>). See  
167 doi: 10.7303/syn22344904.

168

169



170 **2.6. Statistical analysis:** All statistical tests were performed using JMP Pro 14 (JMP, SAS  
171 institute, Cary, NC). Prior to analysis, two data points were removed as outliers using the robust  
172 Huber M test and missing data were imputed using multivariate normal imputation for variables  
173 which were at least 75% complete. Imputation facilitated multivariate data analysis and did not  
174 significantly influence univariate results. Additionally, variables were normalized, centered and  
175 scaled using Johnson's transformation, with normality verification using the Shapiro-Wilk test.  
176 Cognitive scores were adjusted for BMI, sex, age, race and education and their residuals were  
177 used for further analysis. Metabolite inter-correlations were evaluated using Spearman's rank-  
178 order correlations. Variable clustering by hierarchical cluster analysis used the Ward  
179 agglomeration. Multiple comparison control was accomplished with the false discovery rate  
180 (FDR) correction method of Benjamini and Hochberg <sup>30</sup>, with the number of independent  
181 observations determined by the correlative structure of variables (number of variable clusters).

182 Predictive models for fasting state and cognitive functions were prepared using a  
183 combination of bootstrap forest and stepwise linear regression modeling, with Bayesian  
184 information criterion (BIC) cutoff. Variables most frequently appearing in the models were  
185 identified by bootstrap forest (logistic or regression, respectively): trees in forest = 100; terms  
186 sampled per split = 5; bootstrap sample rate = 1. A variable contribution scree plot was generated  
187 using variable rank and the likelihood ratio of chi-square (for categorical fasted/non-fasted  
188 prediction) or sum of squares (for continues cognitive scores). The scree plot was used to  
189 determine a likelihood ratio of chi-square or sum of squares cutoff value for variables  
190 contributing to the model. Selected variables were then subjected to stepwise logistic regressions  
191 for fasted/non-fasted predictions, or stepwise linear regressions for cognitive scores. Data were  
192 split into training (60%) and validation (40%) cohorts, with balanced separation across

193 metabolites and cognitive domains. Stepwise analysis was performed with the maximal  
194 validation  $r^2$  as the model stopping criteria, or if an additional step increased the BIC.

195

### 196 **3. Results**

#### 197 **3.1. Serum lipid mediators predict the fasting state**

198 Our cohort consists of 210 samples including 59 fasted, 80 non-fasted and 71 of unknown  
199 fasting state. Using samples with known fasting state, A fasting state prediction model was  
200 developed using measured PUFA, lipid mediator, bile acid, steroid, clinical lipid and glucose  
201 data. Clinical lipids (e.g. triglycerides or cholesterol) and glucose did not produce strong  
202 predictive models and did not contribute to the final model. A high probability of the fasted state  
203 was described by low levels of the LA-derived CYP metabolite [12(13)-EpOME], low levels of  
204 the primary conjugated bile acid glycochenodeoxycholic acid (GCDCA) and elevated levels of  
205 the glycine-conjugated oleic acid (NO-Gly; **Fig. 1 A and B**). The model misclassification rate  
206 was 12%., with fasting probability described by the **Equation 1** and **Equation 2**.

$$207 \quad \text{Probability for fasted} = \frac{1}{(1 + \text{Exp}(-\text{Lin. prob. fasted}))}$$

208 **Equation 1.** Probability of the fated state. Where “Lin.prob.fasted” is defined by the Equation 2:

209

$$210 \quad \text{Lin. prob. fasted} = 10.01 - (2.82 \times a) + (1.94 \times b) - (1.35 \times c)$$

211 **Equation 2.** Lin prob fasted:  $a = \text{Log}[12(13)\text{-EpOME}]$ ;  $b = \text{Log}(\text{NO-Gly})$ ;  $c = \text{Log}(\text{GCDCA})$ .

212 Concentrations expressed in (nM).

213

214 Oxylipins, endocannabinoids, PUFA, bile acids and steroids create correlative structures  
215 along metabolic pathways or from common precursor fatty acids (**Fig. 1C**). Therefore, similar  
216 fasting state predictions could be achieved by substituting metabolites with ones close in the  
217 correlation network. For example, NO-Gly can be effectively replaced by oleoyl ethanolamide  
218 (OEA). Validation of model was performed using an independent cohort<sup>31</sup> of fasted plasma  
219 (n =133) and showed a misclassification rate of 17%, dropping to 12% when considering  
220 samples with a probability of prediction >70%. To facilitate understanding of oxylipin and  
221 endocannabinoid metabolic relationship, their synthesis pathway from PUFA as well as coverage  
222 of metabolites detected in this study are presented in the **Supplemental Fig. S1**.

223

### 224 **3.2. Fasted and non-fasted serum reveal distinct associations between lipid mediators and** 225 **cognitive functions**

226 Spearman's rank correlations demonstrated associations between serum lipid mediators  
227 and cognitive functions. Cognitive scores were adjusted for BMI, gender, age, race and  
228 education. The analysis was stratified by subject fasting states. **Figure 2** shows correlation  
229 between the five cognitive domains.

230 Oxylipins and endocannabinoids showed the greatest number of associations with  
231 perceptual speed (from 8% to 10% of metabolites in fasted and non-fasted samples respectively,  
232 **Table 1**). The number of associations for other cognitive domains and global cognition did not  
233 exceed 5% of the measured oxylipins and endocannabinoids (**Supplemental Table S2**). Fasted  
234 and non-fasted samples showed distinct correlation patterns. In non-fasted subjects perceptual

235 speed was positively associated with the level of free PUFA, particularly LA, eicosapentaenoic  
236 acid (EPA) and docosahexaenoic acid (DHA), as well as the N-acyl ethanolamides derived from  
237 palmitoleate (POEA), and EPA (EPEA) and the EPA- and DHA-derived mono-alcohols (15-  
238 HEPE and 4-HDoHE respectively). These associations were absent in fasted subjects.  
239 Additionally, when fasted and non-fasted subjects were analyzed together without fasting state  
240 stratification, the above-mentioned associations were either not present or weaker than in non-  
241 fasted subjects alone, see **Supplemental Table S3**).

242 On the other hand, fasted samples manifested negative correlations between perceptual  
243 speed and sEH products of EPA and DHA, and the ratio of LA vicinal diols (i.e. those with two  
244 hydroxy groups on adjacent carbons) to their corresponding epoxides, an estimator of sEH  
245 activity<sup>32</sup>. This association was not detected in non-fasted subjects. Importantly, the cognitive  
246 domains scores were not different between the fasting states. Additionally, interaction with sex  
247 were not detected for the above-mentioned associations.

248 Numerous significant correlations were detected between bile acid levels and cognitive  
249 scores, mainly in non-fasted subjects (episodic memory: 9% to 38%; semantic memory: 3% to  
250 25%; global cognition: 6% to 25%; and perceptual speed: 3% to 16% in fasted and non-fasted  
251 subjects respectively, **Table 2**). Perceptual orientation and working memory showed <6%  
252 associations (**Supplemental Table S2**).

253 In non-fasted subjects, unconjugated bile acids correlated positively with perceptual  
254 speed and semantic memory. On the on the other hand, conjugated bile acids and the ratios of  
255 conjugated to unconjugated bile acids showed negative associations with perceptual speed,  
256 semantic and episodic memory and global cognition. Additionally, positive associations were  
257 observed between the ratio of glycine to taurine conjugated bile acids and episodic memory and

258 global cognition. Negative associations were observed between the ratio of the downstream  
259 product to their precursor - cholic acid (CA) and episodic memory and global cognition. Finally,  
260 negative associations were observed between the ratio of tauro-alpha-muricholic acid  
261 (T-a-MCA) and its precursor chenodeoxycholic acid (CDCA).  
262 Few associations between cognition and bile acids were observed in the fasted subjects. Negative  
263 associations were observed between T-a-MCA and T-a-MCA/CDCA ratio and episodic and  
264 semantic memory, perceptual speed and the global cognition. Also, positive associations were  
265 observed between the ratio of glycine conjugated to unconjugated ursodeoxycholic acid (UDCA)  
266 and episodic memory and global cognition. No associations were found between cognitive  
267 domains and steroid hormones.

268

### 269 **3.3. Fasted state lipid mediators predict perceptual speed**

270 Predictive models revealed covariate relationships between serum lipid mediators and  
271 cognition. Stepwise linear regression models (**Supplemental Table S4**) were built independently  
272 for each cognitive domain and for fasted/non-fasted samples. Valid models could not be  
273 generated using non-fasted subject data. Consistent with Spearman's correlation results,  
274 perceptual speed formed the strongest model ( $R^2_{\text{perceptual speed}} = 0.44$ ;  $R^2_{\text{perceptual orientation}} = 0.4$ ;  
275  $R^2_{\text{episodic memory}} = 0.29$ ;  $R^2_{\text{global cognition}} = 0.24$ ) using samples from fasted subjects. The final model  
276 for perceptual speed is presented in the **Fig. 3**. This model included the ratio of LA-derived  
277 12,13-DiHOME to 12(13)-EpOME, the sum of n-3 diols, consisting of EPA- and DHA-derived  
278 diols (14,15-DiHETE, 17,18-DiHETE and 19,20-DiHDoPE) and T-a-MCA. The epoxide/diol  
279 ratio and the sum of n-3 diols contributed the most to the model, with p-values of 0.0012 and

280 0.0007 respectively, and T-a-MCA with a weaker, but significant contribution (p value = 0.046).

281 **Supplemental Fig. S2** shows correlative structure of all detected metabolites in fasted subjects.

282 Sum of n-3 diols consist of all detected EPA and DHA diols. Corresponding EPA and DHA-

283 derived epoxides were not detected.

284

#### 285 **4. Discussion**

286 In the current study we identified serum lipid mediators associated with cognitive  
287 function in a cohort exhibiting normal to mildly-impaired cognition. Moreover, this study  
288 provides a solution to the unknown fasting state of subjects that may occur when using  
289 opportunistically collected samples, and identifies unique associations with cognition in both  
290 fasted and non-fasted states.

291 Opportunistically collected serum and plasma are often collected without regards an  
292 individuals' fasting state, compromising investigations probing peripheral factors influenced by  
293 postprandial fluctuations in the metabolome<sup>33</sup>, proteome<sup>34</sup> and transcriptome<sup>35</sup>. Using  
294 metabolomic data, we have developed a tool to determine subject fasting states and show  
295 enhanced statistical power with fasting state stratification. In addition, fasting state stratification  
296 highlighted aspects of metabolism which manifest themselves uniquely in the postprandial and  
297 fasted states. Indeed, while fasted serum has been a source of many markers for metabolic  
298 diseases<sup>36</sup>, individual responses to a meal can carry information regarding metabolic flexibility  
299<sup>37</sup>, prediabetes state<sup>38</sup> or postprandial inflammation<sup>39</sup>. To our knowledge, the issue of the mixed  
300 population of fasted and non-fasted subjects in the biobanked samples has not been previously  
301 addressed. As our model was built using absolute quantification it is transferable to other studies,

302 and could be especially useful for cohorts without fasting state information. Of note, the stability  
303 of metabolomics factors used to generate the fasting state predictive model during sub-optimal  
304 collection practices (i.e. storage at room temperature for days prior to refrigeration)<sup>40</sup> and upon  
305 prolong freezer storage were previously described<sup>41</sup>.

306 The postprandial state is the dominant metabolic state due to the common ingestion of  
307 multiple meals yielding 6-8hr postprandial fluctuation in lipoprotein particles<sup>42</sup>, non-esterified  
308 lipids<sup>43</sup>, hormones<sup>33</sup>, etc. The strongest positive associations in the non-fasted samples were  
309 observed between perceptual speed and levels of non-esterified LA, EPA, DHA, the 15-LOX  
310 metabolite of EPA (15-HEPE) and palmitoleate- and EPA-derived ethanolamides (i.e. POEA and  
311 EPEA). Other measured ethanolamides did not show significant associations with perceptual  
312 speed. The positive association between LA and perceptual speed suggests a role of LA in  
313 regulating memory domains, consistent with studies showing reduced LA concentrations in  
314 multiple brain regions affected by Alzheimer's Disease pathology<sup>44</sup>.

315 Ethanolamides are generally considered anti-inflammatory<sup>45</sup> and neuroprotective<sup>46</sup>,  
316 however, their postprandial physiological consequences are not well understood. Like PUFA, all  
317 ethanolamides are lower in non-fasted versus fasted subjects (**Supplemental Fig. S3**) as  
318 previously reported<sup>47</sup>. This may suggest that maintaining a higher level of LA and/or POEA  
319 and/or EPEA in the postprandial state may reflect metabolism beneficial to perceptual speed and  
320 cognition and is not dependent on the "basal" fasted state. The majority of ethanolamide studies  
321 have focused on derivatives of AA, oleic acid and palmitic acid, i.e. AEA, OEA and PEA  
322 respectively. AEA and PEA can activate CB1 and CB2 receptors<sup>48</sup>, important players in  
323 neuroinflammatory processes<sup>49</sup>. Moreover, AEA can similarly activate the transient vanilloid  
324 receptor type 1 (TRPV1) involved in the transduction of acute and inflammatory pain signals in

325 the periphery<sup>50</sup>, and have a variety of functions within the central nervous system, and may  
326 mediate some excitotoxic effects<sup>51</sup>. OEA, a peroxisome proliferator-activated receptor  $\alpha$  agonist,  
327 is a regulator of satiety and sleep with both central and peripheral anorexigenic effects<sup>48</sup>.  
328 Similarly, a satiety effect was achieved by external administration of the linoleoyl ethanolamide  
329 (LEA) and  $\alpha$ -linolenoyl ethanolamide (aLEA) respectively<sup>52</sup>. However, little is known about the  
330 biological actions of POEA and EPEA. Additionally, palmitoleic acid and its metabolites are  
331 highly abundant in adipose tissue and have been described adipose derived lipokines<sup>53</sup>, which  
332 may indicate a specific involvement of adipose tissue in the maintenance of perceptual speed.

333 In the non-fasted state, bile acids manifested similar relationships with perceptual speed,  
334 semantic and episodic memory and global cognition. Generally, cognitive domains showed  
335 positive associations with unconjugated and negative associations with both taurine and glycine  
336 conjugated bile acids, the observation strengthened by associations with  
337 conjugated/unconjugated bile acid ratios, implying a role for liver metabolism in cognitive  
338 maintenance. Of note, the same associations were observed for primary and secondary bile acid.  
339 Additionally, we saw negative associations of episodic memory and global cognition with the  
340 ratio of both conjugated and unconjugated deoxycholic acid (DCA) to cholic acid (CA) and  
341 conjugated lithocholic acid (LCA) to CDCA. Those ratios represent dihydroxylation of primary  
342 bile acids (CA and CDCA) by gut bacteria and were previously reported to be negatively  
343 associated with cognition<sup>54</sup> and atrophy, and brain glucose metabolism in AD<sup>55</sup>.

344 These findings suggest increased liver bile acid modification (i.e. conjugation with amino  
345 acids), as well as gut microbiome activity may negatively influence cognition. Importantly, these  
346 relationships were not observed in fasted samples, suggesting the importance of postprandial



347 metabolism to either drive or highlight these metabolic associations with cognition, warranting  
348 further clinical trials using standardized meal tolerance tests.

349         Using only fasted subjects, we found perceptual speed to be negatively associated with  
350 sEH activity reflected by LA-dependent product: substrate ratios <sup>32</sup>, EPA- and DHA-derived sEH  
351 metabolites, and T-a-MCA and positively associated with the glycine conjugation ratio of UDCA  
352 (GUDCA/UDCA). Notably, and the predictive model for perceptual speed depended on both  
353 sEH activity assessments and sEH-derived omega 3 diols, these metabolic domains appear to  
354 contain independent information. Of note, addition of T-a-MCA provided only slight  
355 improvement to the model and in alternate iterations of the model through bootstrapping could  
356 be replace by free AA (positively associated with perceptual speed). Therefore, our results  
357 implicate eighteen carbon fatty acid metabolism (i.e. sEH action on LA and aLA epoxides) and  
358 long chain omega 3 fatty acid metabolism (i.e. sEH activity on EPA and DHA epoxides) in the  
359 decline of perceptual speed. This is an agreement with two recent studies which showed negative  
360 associations between circulating sEH activity and executive function <sup>56,57</sup>.

361         Epoxy fatty acids have potent vasorelaxant and anti-inflammatory properties, while fatty  
362 acid diols have demonstrated pro-inflammatory effects and actions as inhibitors of protein kinase  
363 B- (i.e. Akt) dependent processes <sup>58</sup>. Recent studies of mice and men have implicated sEH in  
364 neurodegenerative diseases of the brain <sup>59</sup>. Moreover, DHA feeding enhances the therapeutic  
365 efficacy of sEH inhibitors in reducing neurocognitive complications in rodent models of diabetes  
366 <sup>60</sup>. Together, these studies provide strong evidence that the identified shifts in sEH metabolism  
367 in association with cognitive decline may be linked to the underlying pathology of this process.

368         In contrast to the non-fasted state, in the fasted state general association between bile  
369 acids metabolism and cognition were not observed, and few specific bile acids showed

370 significant correlations. The ratio of conjugated to unconjugated UDCA was positively  
371 associated with episodic memory and global cognition, whereas T-a-MCA was negatively  
372 associated with almost all cognitive domains. UDCA and its conjugated derivatives are  
373 hydrophilic bile acids previously reported to improve mitochondrial function <sup>61</sup> and manifest  
374 neuroprotective properties both *in vivo* <sup>62</sup> and prevent amyloid- $\beta$  – induced neuronal death *in*  
375 *vitro* <sup>63</sup>. T-a-MCA appears in the predictive model for perceptual speed, together with sEH,  
376 suggesting their independent association with cognition. GUDCA/UDCA and T-a-MCA both  
377 appear in predictive model for episodic memory and global cognition, suggesting their  
378 independent associations with cognition.

379         In conclusion, here we have analyzed serum from the ROS/MAP cohort using a suite of  
380 targeted metabolomic assays in search of biomarkers of cognitive function with plausible links to  
381 inflammatory responses and energy metabolism. Our study suggests the involvement of sEH and  
382 omega-3 PUFA metabolism in cognition. Moreover, during the course of this effort we have  
383 produced a tool to determine subject fasting state when unknown, and demonstrated the pivotal  
384 nature of this discrimination in biomarker discovery. We have demonstrated that the fasted and  
385 non-fasted states carry distinct information regarding the connection of metabolism and  
386 cognition. As opportunistically collected non-fasted samples manifest high variance, future  
387 studies using a standardized mix meal tolerance test <sup>64</sup> could prove useful to validate and  
388 discover new relationships between postprandial metabolism and cognition.

389

390 **Author Contributions:**

391 KB, TP and JWN adapted analytical methods, conducted analyses, and evaluated analytical data  
392 quality. KB, AYT and JWN developed statistical analysis plan. KB conducted statistical  
393 analyses. DAB obtained study samples. DAB, PLDJ and RK-D were responsible for study  
394 design and procured funding. KB and JWN wrote the manuscript. All authors edited and  
395 approved the manuscript.

396

397 **Acknowledgement:** The data presented here are in whole or in part based on data obtained from  
398 the AMP-AD Knowledge Portal (<https://adknowledgeportal.synapse.org/#/Explore/Data>).  
399 Metabolomics data is provided by the Alzheimer's Disease Metabolomics Consortium (ADMC)  
400 and funded wholly or in part by the following grants and supplements thereto: NIA  
401 R01AG046171, RF1AG051550, RF1AG057452, R01AG059093, RF1AG058942,  
402 U01AG061359, U19AG063744 and FNIH: #DAOU16AMPA awarded to Dr. Kaddurah-Daouk  
403 at Duke University in partnership with a large number of academic institutions. As such, the  
404 investigators within the ADMC, not listed specifically in this publication's author's list, provided  
405 data but did not participate in analysis or writing of this manuscript. A complete listing of  
406 ADMC investigators can be found at: <https://sites.duke.edu/adnimetab/team/>. The Religious  
407 Orders and the Rush Memory and Aging studies (ROS/MAP) was funded by the following NIA  
408 grants awarded to Dr. David Bennet at Rush University [P30AG10161, R01AG16819,  
409 R01AG17917, U01AG61356]. ROSMAP data can be requested at <https://www.radc.rush.edu>.  
410 Additional support was provided by USDA Intramural Project 2032-51530-022-00D and NIH  
411 U24 DK097154 awarded to John W. Newman. The USDA is an equal opportunity employer and  
412 provider.

413 **Conflicts of Interest:** none

414

415 **Tables**

416 **Table 1. Spearman’s rank order correlations between serum oxylipins and**  
 417 **endocannabinoids and perceptual speed.** The numbers represent Spearman’s  $\rho$  with the p  
 418 value  $<0.05$  and FDR corrected with the  $q = 0.2$ . Full names of all identified compounds are  
 419 presented in the **Supplemental Table S1** and correlation for all cognitive domains are presented  
 420 in the **Supplemental Table S2**.

| Metabolite                                                | Non-Fasted<br>(n =142) | Fasted<br>(n =71) |
|-----------------------------------------------------------|------------------------|-------------------|
| <b>Fatty acids, ethanolamides and hydroxy fatty acids</b> |                        |                   |
| LA                                                        | 0.25                   | 0.26              |
| AA                                                        |                        |                   |
| EPA                                                       | 0.22                   |                   |
| DHA                                                       | 0.25                   |                   |
| EPEA                                                      | 0.18                   |                   |
| POEA                                                      | 0.24                   |                   |
| 4-HDoHE                                                   | 0.18                   |                   |
| 15-HEPE                                                   | 0.2                    |                   |
| <b>Dihydroxy fatty acids - sEH pathway</b>                |                        |                   |
| 14,15-DiHETE                                              |                        | -0.27             |
| 19,20-DiHD $\omega$ PE                                    | 0.2                    | -0.31             |
| Sum (n3-Diols)                                            |                        | -0.28             |
| Sum (DiHETEs)                                             |                        | -0.25             |
| 12,13-DiHOME/<br>12(13)-EpOME                             |                        | -0.32             |
| <b>Prostaglandins - COX pathway</b>                       |                        |                   |
| PGD2                                                      |                        | 0.25              |

421

422

423 **Table 2. Spearman's rank order correlations between serum bile acids and cognitive**  
 424 **domains.** The numbers represent Spearman's  $\rho$  with the p value <0.05 and FDR corrected with  
 425 the  $q=0.2$ . Full names of all identified compounds are presented in the **Supplemental Table S1**  
 426 and correlation for all cognitive domains are presented in the **Supplemental Table S2.** PS –  
 427 perceptual speed; SE – semantic memory; EP – episodic memory; Global – global cognition.

| Metabolite                                      | Non-Fasted (n=142) |       |       |        | Fasted (n=71) |       |       |        |
|-------------------------------------------------|--------------------|-------|-------|--------|---------------|-------|-------|--------|
|                                                 | PS                 | SE    | EP    | Global | PS            | SE    | EP    | Global |
| <b>Bile Acids - unconjugated</b>                |                    |       |       |        |               |       |       |        |
| CDCA                                            | 0.2                | 0.19  |       |        |               |       | 0.27  |        |
| DCA                                             |                    | 0.2   |       |        |               |       |       |        |
| <b>Bile Acids - conjugated</b>                  |                    |       |       |        |               |       |       |        |
| TCDCA                                           |                    | -0.2  |       |        |               |       |       |        |
| TLCA                                            | -0.2               | -0.27 | -0.28 | -0.29  |               |       |       |        |
| TDCA                                            |                    |       | -0.18 |        |               |       |       |        |
| GDCA                                            |                    |       | -0.21 |        |               |       |       |        |
| <b>Bile acids - conjugated/unconjugated</b>     |                    |       |       |        |               |       |       |        |
| TDCA/DCA                                        |                    | -0.25 | -0.18 | -0.22  |               |       |       |        |
| GDCA/DCA                                        |                    | -0.3  | -0.23 | -0.27  |               |       |       |        |
| GCDCA/CDCA                                      | -0.24              | -0.28 |       | -0.2   |               |       |       |        |
| GCA/CA                                          |                    |       | -0.22 |        |               |       |       |        |
| TCA/CA                                          |                    |       | -0.21 |        |               |       |       |        |
| GUDCA/UDCA                                      |                    |       |       |        |               |       | 0.3   | 0.32   |
| <b>Bile acids - glycine/taurine</b>             |                    |       |       |        |               |       |       |        |
| (GDCA+GLCA)/<br>(TDCA+TLCA)                     |                    |       | 0.18  | 0.19   |               |       |       |        |
| <b>Bile Acids - dehydroxylation by bacteria</b> |                    |       |       |        |               |       |       |        |
| TDCA/CA                                         |                    |       | -0.26 | -0.19  |               |       |       |        |
| GDCA/CA                                         |                    |       | -0.28 | -0.18  |               |       |       |        |
| DCA/CA                                          |                    |       | -0.19 |        |               |       |       |        |
| GLCA/CDCA                                       | -0.19              |       |       |        |               |       |       |        |
| TLCA/CDCA                                       | -0.24              | -0.28 | -0.24 | -0.27  |               |       |       |        |
| <b>Bile Acids - other</b>                       |                    |       |       |        |               |       |       |        |
| T-a-MCA                                         |                    |       |       |        | -0.28         | -0.26 | -0.29 | -0.31  |
| T-a-MCA/CDCA                                    | -0.22              | -0.27 |       | -0.2   |               | -0.26 | -0.35 | -0.31  |
| w-MCA/T-a-MCA                                   |                    | 0.23  |       | 0.2    |               | 0.28  |       |        |

428

## 429 5. References

- 430 1 Wilson, R. S., Segawa, E., Hizel, L. P., Boyle, P. A. & Bennett, D. A. Terminal dedifferentiation of  
431 cognitive abilities. *Neurology* **78**, 1116-1122, doi:10.1212/WNL.0b013e31824f7ff2 (2012).
- 432 2 Magistro, D. *et al.* The Relationship between Processing Speed and Regional White Matter  
433 Volume in Healthy Young People. *Plos One* **10**, doi:ARTN e0136386  
434 10.1371/journal.pone.0136386 (2015).
- 435 3 Alkan, E. *et al.* Metabolic syndrome alters relationships between cardiometabolic variables,  
436 cognition and white matter hyperintensity load. *Sci Rep* **9**, 4356, doi:10.1038/s41598-019-  
437 40630-6 (2019).
- 438 4 Bosia, M. *et al.* Improving Cognition to Increase Treatment Efficacy in Schizophrenia: Effects of  
439 Metabolic Syndrome on Cognitive Remediation's Outcome. *Front Psychiatry* **9**, 647,  
440 doi:10.3389/fpsy.2018.00647 (2018).
- 441 5 Monthe-Dreze, C., Rifas-Shiman, S. L., Gold, D. R., Oken, E. & Sen, S. Maternal obesity and  
442 offspring cognition: the role of inflammation. *Pediatr Res* **85**, 799-806, doi:10.1038/s41390-018-  
443 0229-z (2019).
- 444 6 Shearer, G. C. *et al.* Abnormal lipoprotein oxylipins in metabolic syndrome and partial correction  
445 by omega-3 fatty acids. *Prostaglandins Leukot Essent Fatty Acids* **128**, 1-10,  
446 doi:10.1016/j.plefa.2017.10.006 (2018).
- 447 7 Grapov, D., Adams, S. H., Pedersen, T. L., Garvey, W. T. & Newman, J. W. Type 2 diabetes  
448 associated changes in the plasma non-esterified fatty acids, oxylipins and endocannabinoids.  
449 *PLoS One* **7**, e48852, doi:10.1371/journal.pone.0048852 (2012).
- 450 8 Picklo, M. J. & Newman, J. W. Antioxidant supplementation and obesity have independent  
451 effects on hepatic oxylipin profiles in insulin-resistant, obesity-prone rats. *Free Radical Bio Med*  
452 **89**, 182-191, doi:10.1016/j.freeradbiomed.2015.07.152 (2015).
- 453 9 Gabbs, M., Leng, S., Devassy, J. G., Monirujjaman, M. & Aukema, H. M. Advances in Our  
454 Understanding of Oxylipins Derived from Dietary PUFAs. *Adv Nutr* **6**, 513-540,  
455 doi:10.3945/an.114.007732 (2015).
- 456 10 Jones, R. D. *et al.* Epoxy-Oxylipins and Soluble Epoxide Hydrolase Metabolic Pathway as Targets  
457 for NSAID-Induced Gastroenteropathy and Inflammation-Associated Carcinogenesis. *Front*  
458 *Pharmacol* **10**, 731, doi:10.3389/fphar.2019.00731 (2019).
- 459 11 Nayeem, M. A. Role of oxylipins in cardiovascular diseases. *Acta Pharmacol Sin* **39**, 1142-1154,  
460 doi:10.1038/aps.2018.24 (2018).
- 461 12 Barquissau, V. *et al.* Control of adipogenesis by oxylipins, GPCRs and PPARs. *Biochimie* **136**, 3-11,  
462 doi:10.1016/j.biochi.2016.12.012 (2017).

- 463 13 Ahmad, T. R. & Haeusler, R. A. Bile acids in glucose metabolism and insulin signalling -  
464 mechanisms and research needs. *Nat Rev Endocrinol* **15**, 701-712, doi:10.1038/s41574-019-  
465 0266-7 (2019).
- 466 14 Li, T. & Apte, U. Bile Acid Metabolism and Signaling in Cholestasis, Inflammation, and Cancer.  
467 *Adv Pharmacol* **74**, 263-302, doi:10.1016/bs.apha.2015.04.003 (2015).
- 468 15 Chiang, J. Y. Bile acid metabolism and signaling. *Compr Physiol* **3**, 1191-1212,  
469 doi:10.1002/cphy.c120023 (2013).
- 470 16 Ferrell, J. M. & Chiang, J. Y. L. Understanding Bile Acid Signaling in Diabetes: From  
471 Pathophysiology to Therapeutic Targets. *Diabetes Metab J* **43**, 257-272,  
472 doi:10.4093/dmj.2019.0043 (2019).
- 473 17 Devassy, J. G., Leng, S., Gabbs, M., Monirujjaman, M. & Aukema, H. M. Omega-3  
474 Polyunsaturated Fatty Acids and Oxylipins in Neuroinflammation and Management of Alzheimer  
475 Disease. *Adv Nutr* **7**, 905-916, doi:10.3945/an.116.012187 (2016).
- 476 18 Nho, K. *et al.* Altered bile acid profile in mild cognitive impairment and Alzheimer's disease:  
477 Relationship to neuroimaging and CSF biomarkers. *Alzheimers & Dementia* **15**, 232-244,  
478 doi:10.1016/j.jalz.2018.08.012 (2019).
- 479 19 MahmoudianDehkordi, S. *et al.* Altered bile acid profile associates with cognitive impairment in  
480 Alzheimer's disease-An emerging role for gut microbiome. *Alzheimers & Dementia* **15**, 76-92,  
481 doi:10.1016/j.jalz.2018.07.217 (2019).
- 482 20 Vest, R. S. & Pike, C. J. Gender, sex steroid hormones, and Alzheimer's disease. *Horm Behav* **63**,  
483 301-307, doi:10.1016/j.yhbeh.2012.04.006 (2013).
- 484 21 Lv, W. *et al.* Low Testosterone Level and Risk of Alzheimer's Disease in the Elderly Men: a  
485 Systematic Review and Meta-Analysis. *Mol Neurobiol* **53**, 2679-2684, doi:10.1007/s12035-015-  
486 9315-y (2016).
- 487 22 Yu, D. *et al.* Soluble Epoxide Hydrolase-Derived Linoleic Acid Oxylipins in Serum Are Associated  
488 with Periventricular White Matter Hyperintensities and Vascular Cognitive Impairment. *Transl*  
489 *Stroke Res*, doi:10.1007/s12975-018-0672-5 (2018).
- 490 23 Bennett, D. A. *et al.* Religious Orders Study and Rush Memory and Aging Project. *J Alzheimers Dis*  
491 **64**, S161-S189, doi:10.3233/JAD-179939 (2018).
- 492 24 Bennett, D. A. *et al.* Natural history of mild cognitive impairment in older persons. *Neurology* **59**,  
493 198-205, doi:10.1212/wnl.59.2.198 (2002).
- 494 25 Bennett, D. A. *et al.* Decision rules guiding the clinical diagnosis of Alzheimer's disease in two  
495 community-based cohort studies compared to standard practice in a clinic-based cohort study.  
496 *Neuroepidemiology* **27**, 169-176, doi:10.1159/000096129 (2006).
- 497 26 Bennett, D. A. *et al.* Neuropathology of older persons without cognitive impairment from two  
498 community-based studies. *Neurology* **66**, 1837-1844, doi:10.1212/01.wnl.0000219668.47116.e6  
499 (2006).
- 500 27 Lamar, M. *et al.* Associations of literacy with diabetes indicators in older adults. *J Epidemiol*  
501 *Community Health* **73**, 250-255, doi:10.1136/jech-2018-210977 (2019).

- 502 28 La Frano, M. R. *et al.* Diet-induced obesity and weight loss alter bile acid concentrations and bile  
503 acid-sensitive gene expression in insulin target tissues of C57BL/6J mice. *Nutr Res* **46**, 11-21,  
504 doi:10.1016/j.nutres.2017.07.006 (2017).
- 505 29 Pedersen, T. L. & Newman, J. W. Establishing and Performing Targeted Multi-residue Analysis for  
506 Lipid Mediators and Fatty Acids in Small Clinical Plasma Samples. *Methods Mol Biol* **1730**, 175-  
507 212, doi:10.1007/978-1-4939-7592-1\_13 (2018).
- 508 30 Benjamini, Y. & Yekutieli, D. Quantitative trait loci analysis using the false discovery rate.  
509 *Genetics* **171**, 783-789, doi:10.1534/genetics.104.036699 (2005).
- 510 31 Goetz, M. E. *et al.* Rationale and Design of the Emory Healthy Aging and Emory Healthy Brain  
511 Studies. *Neuroepidemiology* **53**, 187-200, doi:10.1159/000501856 (2019).
- 512 32 Lee, C. R. *et al.* Genetic variation in soluble epoxide hydrolase (EPHX2) and risk of coronary heart  
513 disease: The Atherosclerosis Risk in Communities (ARIC) study. *Hum Mol Genet* **15**, 1640-1649,  
514 doi:10.1093/hmg/ddl085 (2006).
- 515 33 Racz, B. *et al.* Daily profiles of steroid hormones and their metabolites related to food intake.  
516 *Physiol Res* **64 Suppl 2**, S219-225 (2015).
- 517 34 Camargo, A. *et al.* Postprandial changes in the proteome are modulated by dietary fat in  
518 patients with metabolic syndrome. *J Nutr Biochem* **24**, 318-324,  
519 doi:10.1016/j.jnutbio.2012.06.014 (2013).
- 520 35 Sagaya, F. M., Hurrell, R. F. & Vergeres, G. Postprandial blood cell transcriptomics in response to  
521 the ingestion of dairy products by healthy individuals. *J Nutr Biochem* **23**, 1701-1715,  
522 doi:10.1016/j.jnutbio.2012.01.001 (2012).
- 523 36 Zheng, M. *et al.* Relationship between inflammatory markers and mild cognitive impairment in  
524 Chinese patients with type 2 diabetes: a case-control study. *BMC Endocr Disord* **19**, 73,  
525 doi:10.1186/s12902-019-0402-3 (2019).
- 526 37 Chu, L., Morrison, K. M., Riddell, M. C., Raha, S. & Timmons, B. W. Validity and reliability of a  
527 novel metabolic flexibility test in children with obesity. *J Appl Physiol (1985)* **124**, 1062-1070,  
528 doi:10.1152/jappphysiol.00093.2017 (2018).
- 529 38 Kumar, A. A. *et al.* Postprandial Metabolism is Impaired in Overweight Normoglycemic Young  
530 Adults without Family History of Diabetes. *Sci Rep* **10**, 353, doi:10.1038/s41598-019-57257-2  
531 (2020).
- 532 39 de Vries, M. A. *et al.* Postprandial inflammation: targeting glucose and lipids. *Adv Exp Med Biol*  
533 **824**, 161-170, doi:10.1007/978-3-319-07320-0\_12 (2014).
- 534 40 La Frano, M. R. *et al.* Impact of post-collection freezing delay on the reliability of serum  
535 metabolomics in samples reflecting the California mid-term pregnancy biobank. *Metabolomics*  
536 **14**, 151, doi:10.1007/s11306-018-1450-9 (2018).
- 537 41 Koch, E. *et al.* Stability of oxylipins during plasma generation and long-term storage. *Talanta*  
538 **217**, 121074, doi:10.1016/j.talanta.2020.121074 (2020).



- 539 42 Karpe, F., Steiner, G., Uffelman, K., Olivecrona, T. & Hamsten, A. Postprandial lipoproteins and  
540 progression of coronary atherosclerosis. *Atherosclerosis* **106**, 83-97, doi:10.1016/0021-  
541 9150(94)90085-x (1994).
- 542 43 Jackson, K. G., Wolstencroft, E. J., Bateman, P. A., Yaqoob, P. & Williams, C. M. Acute effects of  
543 meal fatty acids on postprandial NEFA, glucose and apo E response: implications for insulin  
544 sensitivity and lipoprotein regulation? *Br J Nutr* **93**, 693-700, doi:10.1079/bjn20051410 (2005).
- 545 44 Snowden, S. G. *et al.* Association between fatty acid metabolism in the brain and Alzheimer  
546 disease neuropathology and cognitive performance: A nontargeted metabolomic study. *PLoS*  
547 *Med* **14**, e1002266, doi:10.1371/journal.pmed.1002266 (2017).
- 548 45 Turcotte, C., Chouinard, F., Lefebvre, J. S. & Flamand, N. Regulation of inflammation by  
549 cannabinoids, the endocannabinoids 2-arachidonoyl-glycerol and arachidonoyl-ethanolamide,  
550 and their metabolites. *J Leukoc Biol* **97**, 1049-1070, doi:10.1189/jlb.3RU0115-021R (2015).
- 551 46 Petrosino, S. & Di Marzo, V. The pharmacology of palmitoylethanolamide and first data on the  
552 therapeutic efficacy of some of its new formulations. *Br J Pharmacol* **174**, 1349-1365,  
553 doi:10.1111/bph.13580 (2017).
- 554 47 Joosten, M. M., Balvers, M. G., Verhoeckx, K. C., Hendriks, H. F. & Witkamp, R. F. Plasma  
555 anandamide and other N-acyl ethanolamines are correlated with their corresponding free fatty  
556 acid levels under both fasting and non-fasting conditions in women. *Nutr Metab (Lond)* **7**, 49,  
557 doi:10.1186/1743-7075-7-49 (2010).
- 558 48 Bradshaw, H. B. & Walker, J. M. The expanding field of cannabimimetic and related lipid  
559 mediators. *Br J Pharmacol* **144**, 459-465 (2005).
- 560 49 Saito, V. M., Rezende, R. M. & Teixeira, A. L. Cannabinoid modulation of neuroinflammatory  
561 disorders. *Curr Neuropharmacol* **10**, 159-166, doi:10.2174/157015912800604515 (2012).
- 562 50 Bradshaw, H. B., Raboune, S. & Hollis, J. L. Opportunistic activation of TRP receptors by  
563 endogenous lipids: exploiting lipidomics to understand TRP receptor cellular communication.  
564 *Life Sci* **92**, 404-409, doi:10.1016/j.lfs.2012.11.008 (2013).
- 565 51 Kim, S. R. *et al.* Roles of transient receptor potential vanilloid subtype 1 and cannabinoid type 1  
566 receptors in the brain: neuroprotection versus neurotoxicity. *Mol Neurobiol* **35**, 245-254,  
567 doi:10.1007/s12035-007-0030-1 (2007).
- 568 52 Ho, M., Anderson, G. H., Lin, L., Bazinet, R. P. & Kubant, R. Ethanolamides of essential alpha-  
569 linolenic and linoleic fatty acids suppress short-term food intake in rats. *Food Funct*,  
570 doi:10.1039/c9fo02884f (2020).
- 571 53 Frigolet, M. E. & Gutierrez-Aguilar, R. The Role of the Novel Lipokine Palmitoleic Acid in Health  
572 and Disease. *Adv Nutr* **8**, 173S-181S, doi:10.3945/an.115.011130 (2017).
- 573 54 MahmoudianDehkordi, S. *et al.* Altered bile acid profile associates with cognitive impairment in  
574 Alzheimer's disease-An emerging role for gut microbiome. *Alzheimers Dement* **15**, 76-92,  
575 doi:10.1016/j.jalz.2018.07.217 (2019).
- 576 55 Nho, K. *et al.* Altered bile acid profile in mild cognitive impairment and Alzheimer's disease:  
577 Relationship to neuroimaging and CSF biomarkers. *Alzheimers Dement* **15**, 232-244,  
578 doi:10.1016/j.jalz.2018.08.012 (2019).

- 579 56 Yu, D. *et al.* Soluble Epoxide Hydrolase-Derived Linoleic Acid Oxylipins in Serum Are Associated  
580 with Periventricular White Matter Hyperintensities and Vascular Cognitive Impairment. *Transl*  
581 *Stroke Res* **10**, 522-533, doi:10.1007/s12975-018-0672-5 (2019).
- 582 57 Shinto, L. *et al.* Oxidized Products of Omega-6 and Omega-3 Long Chain Fatty Acids Are  
583 Associated with Increased White Matter Hyperintensity and Poorer Executive Function  
584 Performance in a Cohort of Cognitively Normal Hypertensive Older Adults. *J Alzheimers Dis* **74**,  
585 65-77, doi:10.3233/JAD-191197 (2020).
- 586 58 Wagner, K. M., McReynolds, C. B., Schmidt, W. K. & Hammock, B. D. Soluble epoxide hydrolase  
587 as a therapeutic target for pain, inflammatory and neurodegenerative diseases. *Pharmacol Ther*  
588 **180**, 62-76, doi:10.1016/j.pharmthera.2017.06.006 (2017).
- 589 59 Hashimoto, K. Role of Soluble Epoxide Hydrolase in Metabolism of PUFAs in Psychiatric and  
590 Neurological Disorders. *Front Pharmacol* **10**, 36, doi:10.3389/fphar.2019.00036 (2019).
- 591 60 Pardeshi, R. *et al.* Docosahexaenoic Acid Increases the Potency of Soluble Epoxide Hydrolase  
592 Inhibitor in Alleviating Streptozotocin-Induced Alzheimer's Disease-Like Complications of  
593 Diabetes. *Front Pharmacol* **10**, 288, doi:10.3389/fphar.2019.00288 (2019).
- 594 61 Bell, S. M. *et al.* Ursodeoxycholic Acid Improves Mitochondrial Function and Redistributes Drp1  
595 in Fibroblasts from Patients with Either Sporadic or Familial Alzheimer's Disease. *J Mol Biol* **430**,  
596 3942-3953, doi:10.1016/j.jmb.2018.08.019 (2018).
- 597 62 Keene, C. D. *et al.* Tauroursodeoxycholic acid, a bile acid, is neuroprotective in a transgenic  
598 animal model of Huntington's disease. *Proc Natl Acad Sci U S A* **99**, 10671-10676,  
599 doi:10.1073/pnas.162362299 (2002).
- 600 63 Sola, S., Castro, R. E., Laires, P. A., Steer, C. J. & Rodrigues, C. M. Tauroursodeoxycholic acid  
601 prevents amyloid-beta peptide-induced neuronal death via a phosphatidylinositol 3-kinase-  
602 dependent signaling pathway. *Mol Med* **9**, 226-234, doi:10.2119/2003-00042.rodrigues (2003).
- 603 64 Ruan, Y. *et al.* Mixed-meal tolerance test to assess residual beta-cell secretion: Beyond the area-  
604 under-curve of plasma C-peptide concentration. *Pediatr Diabetes* **20**, 282-285,  
605 doi:10.1111/pedi.12816 (2019).

606

607

608

609

610

611

612

## 613 **Figure Legends**

### 614 **Figure 1: Serum lipid metabolites and bile acids are predictors of the fasting state. A)**

615 Stepwise logistic model parameters predicting the fasting state using 12(13)-EpOME, GCDCA  
616 and NO-Gly. **B)** Visualization of the correlative environment (generated using hierarchical  
617 clustering) of metabolites used for fasting state prediction. Nodes represent branching points in  
618 the hierarchical clustering network with metabolites on the fringe named. Metabolite used in the  
619 final model are indicated by colors. Directionality of changes in metabolites due to non-fasted  
620 state compared to the fasted state are indicated by arrows.

621

622 **Figure 2.** Correlative relationships between cognitive domains. A) Hierarchical clustering of  
623 cognitive domains using Ward method. B) Pearson's correlation matrix. PO – perceptual  
624 orientation; WO – working memory; PS – perceptual speed; SE – semantic memory; EP –  
625 episodic memory; Global – global cognition.

626

### 627 **Figure 3: Least square regression model of perceptual speed. A)** Actual by predicted plot of a

628 whole model and leverage plots of model components. **B)** Model cross-validation statistics using  
629 training set (60%, n =44) and validation set (40%, n =33). **C)** Model components of soluble  
630 epoxide hydrolase metabolism projected onto their metabolic pathway. Metabolic pathway starts  
631 with the fatty acids on the left, farther, metabolizing enzymes are indicated on the arrows.

632 Multiple possible metabolites of the pathway are indicated. Metabolites of sEH used for the

633 model are highlighted. Color of the metabolites as well as an arrow next to the metabolic

634 pathway represents directionality of the correlation with perceptual speed (orange – positive,  
635 blue – negative). RMSE – root mean squared error, LA – linoleic acid, CYP 450 – cytochrome  
636 p450, sEH – soluble epoxide hydrolase, EpOME – epoxy octadecanoic acid, DiHOME –  
637 dihydroxy octadecanoic acid, EpETE – epoxy eicosatrienoic acid, DiHETE – dihydroxy  
638 eicosatrienoic acid, EpDPE – epoxy docosapentaenoic acid, DiHDoPE – dihydroxy  
639 docosapentaenoic acid.

640

| A | Source            | PValue  | B | Measure                | Training | Validation |
|---|-------------------|---------|---|------------------------|----------|------------|
|   | Log[12(13)-EpOME] | <0.0001 |   | Generalized RSquare    | 0.74     | 0.47       |
|   | Log[NO-Gly]       | 0.00089 |   | RMSE                   | 0.27     | 0.36       |
|   | Log[GCDCA]        | 0.0018  |   | Misclassification Rate | 0.067    | 0.18       |
|   |                   |         |   | N                      | 90       | 67         |

C

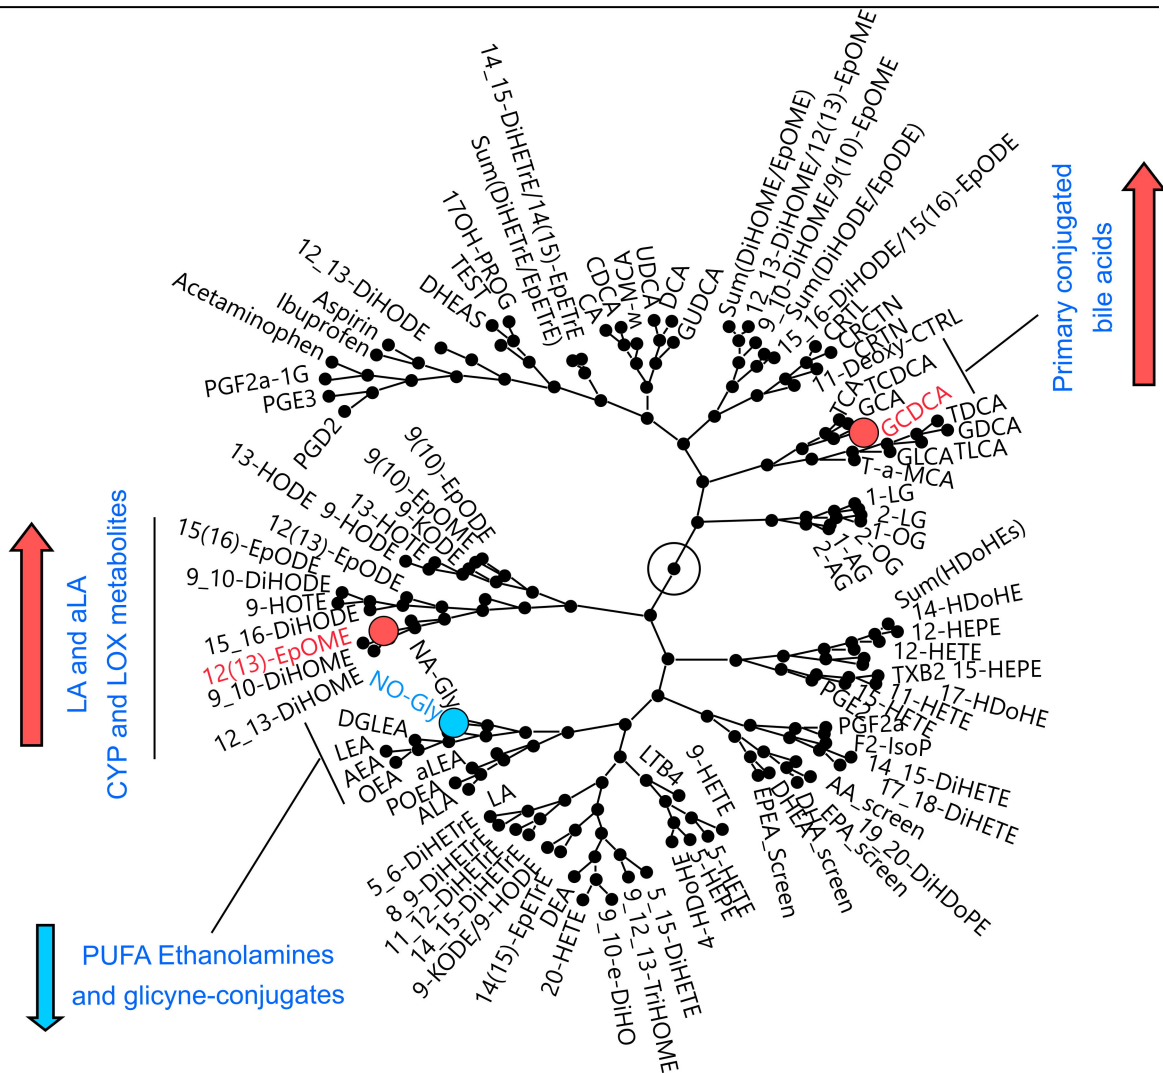

# A

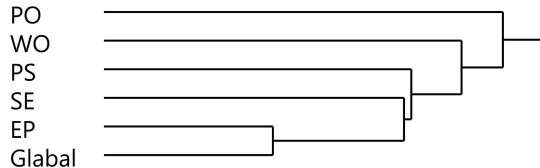

# B

|        | PO   | WO   | PS   | SE   | EP   | Global |
|--------|------|------|------|------|------|--------|
| PO     | 1    | 0.16 | 0.27 | 0.24 | 0.22 | 0.44   |
| WO     | 0.16 | 1    | 0.26 | 0.41 | 0.33 | 0.6    |
| PS     | 0.27 | 0.26 | 1    | 0.57 | 0.51 | 0.7    |
| SE     | 0.24 | 0.41 | 0.57 | 1    | 0.52 | 0.75   |
| EP     | 0.22 | 0.33 | 0.51 | 0.52 | 1    | 0.87   |
| Global | 0.44 | 0.6  | 0.7  | 0.75 | 0.87 | 1      |

A)

## Whole Model

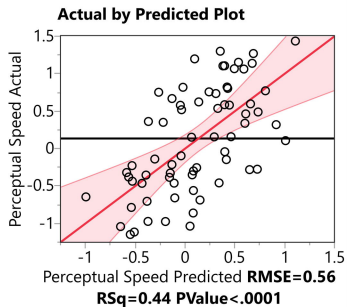

## Leverage Plot

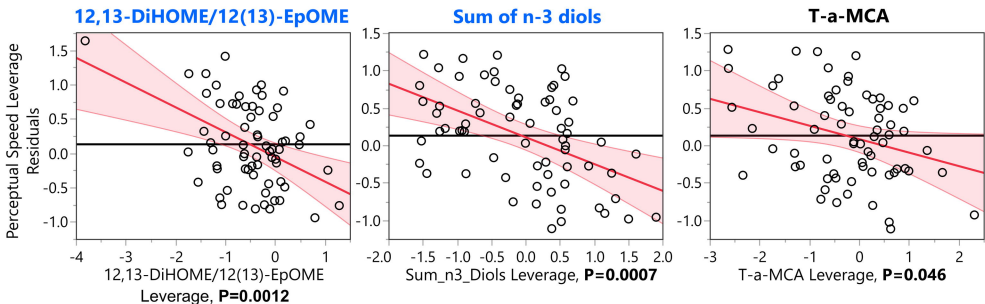

B)

## Crossvalidation

| Source         | RSquare | RASE | Freq |
|----------------|---------|------|------|
| Training Set   | 0.44    | 0.54 | 44   |
| Validation Set | 0.23    | 0.58 | 24   |

C)

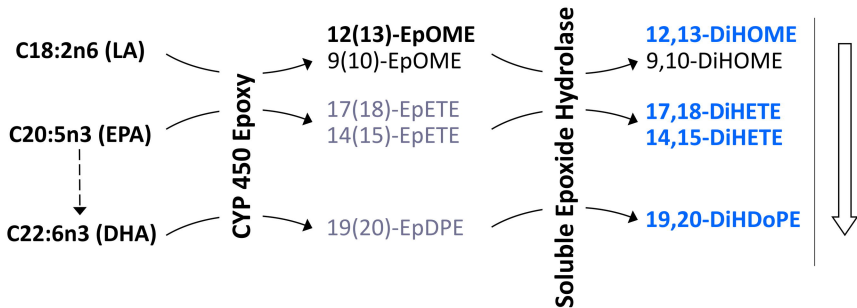

Source: https://www.biorxiv.org/content/10.1101/2020.09.03.282343v1.full.pdf
